# Supplementary material
Source: PubMed Central journal article supplement (PMC5777311)

SUPPLEMENTAL MATERIALS

**Neutrophil-to-Lymphocyte Ratio/Platelet-to-Lymphocyte  
Ratio and Mortality among Hemodialysis Patients**

Christina Catabay, Yoshitsugu Obi, Elani Streja, Melissa Soohoo, Christina Park,  
Connie M. Rhee, Csaba P. Kovesdy, Takayuki Hamano, and Kamyar Kalantar-Zadeh

**Supplemental Table 1.** Characteristics among 108,548 included vs. 47,681 incident

hemodialysis patients.

|                                          | Included          | Excluded          | Standardized difference |
|------------------------------------------|-------------------|-------------------|-------------------------|
| n (%)                                    | 108,548 (69%)     | 47,681 (31%)      | N/A                     |
| Age (years)                              | 63 ± 15           | 63 ± 16           | 0.00                    |
| Female (%)                               | 44                | 42                | -0.03                   |
| Race (%)                                 |                   |                   | 0.22                    |
| Caucasian                                | 47                | 61                |                         |
| African American                         | 32                | 23                |                         |
| Hispanics                                | 15                | 11                |                         |
| Asians                                   | 3                 | 3                 |                         |
| Others                                   | 4                 | 3                 |                         |
| Insurance (%)                            |                   |                   | 0.16                    |
| Medicare                                 | 54                | 48                |                         |
| Medicaid                                 | 7                 | 6                 |                         |
| Others                                   | 39                | 46                |                         |
| Access Type (%)                          |                   |                   | 0.27                    |
| Central venous catheter                  | 75                | 71                |                         |
| AV Fistula                               | 15                | 13                |                         |
| AV Graft                                 | 4                 | 3                 |                         |
| AV Other                                 | 0.1               | 0.1               |                         |
| Unknown                                  | 6                 | 13                |                         |
| Body Mass Index (kg/m <sup>2</sup> )     | 26.7 (23.0, 31.8) | 26.9 (23.0, 32.2) | 0.03                    |
| Single-pool Kt/v                         | 1.47 ± 0.32       | 1.44 ± 0.43       | -0.08                   |
| Normalized PCR (g/kg/day)                | 0.77 (0.64, 0.92) | 0.67 (0.51, 0.84) | -0.44                   |
| Co-morbidities (%)                       |                   |                   |                         |
| Hypertension                             | 51                | 44                | -0.15                   |
| Diabetes                                 | 59                | 44                | -0.28                   |
| Dyslipidemia                             | 25                | 22                | -0.09                   |
| Atherosclerotic heart disease            | 14                | 12                | -0.06                   |
| Congestive heart failure                 | 37                | 22                | -0.33                   |
| Other cardiac disease                    | 15                | 13                | -0.07                   |
| Cerebrovascular disease                  | 2                 | 1                 | -0.04                   |
| Cancer                                   | 2                 | 2                 | 0.01                    |
| COPD                                     | 5                 | 4                 | -0.05                   |
| HIV/AIDS                                 | 0.5               | 0.4               | -0.01                   |
| Liver Disease                            | 1                 | 2                 | 0.02                    |
| Alcohol                                  | 0.2               | 0.3               | 0.01                    |
| Substance Abuse                          | 0.2               | 0.2               | -0.01                   |
| Laboratory variables                     |                   |                   |                         |
| Hemoglobin (g/dl)                        | 11.1 ± 1.2        | 10.6 ± 1.4        | -0.41                   |
| WBC (x10 <sup>3</sup> /mm <sup>3</sup> ) | 7.5 (6.1, 9.1)    | 8.0 (6.3, 10.1)   | 0.21                    |

|                                                 |                |                |       |
|-------------------------------------------------|----------------|----------------|-------|
| Neutrophil (x10 <sup>3</sup> /mm <sup>3</sup> ) | 5.1 (4.0, 6.4) | 5.6 (4.2, 7.3) | 0.24  |
| Lymphocyte (x10 <sup>3</sup> /mm <sup>3</sup> ) | 1.4 (1.1, 1.8) | 1.3 (0.9, 1.7) | -0.21 |
| Platelet (x10 <sup>3</sup> /mm <sup>3</sup> )   | 249 (199, 307) | 243 (182, 312) | -0.07 |
| Albumin (g/dl)                                  | 3.5 ± 0.5      | 3.4 ± 0.6      | -0.22 |
| Creatinine (g/dl)                               | 5.9 ± 2.4      | 5.3 ± 2.5      | -0.25 |
| Calcium (mg/dl)                                 | 9.1 ± 0.6      | 9.1 ± 0.7      | 0.01  |
| Phosphorus (mg/dl)                              | 4.9 ± 1.1      | 4.6 ± 1.3      | -0.24 |
| Intact PTH (pg/ml)                              | 314 (197, 486) | 271 (153, 450) | -0.20 |
| Alkaline Phosphatase (IU/L)                     | 87 (69, 115)   | 88 (68, 120)   | 0.03  |
| TIBC (mg/dl)                                    | 225 ± 49       | 217 ± 58       | -0.14 |
| Iron Saturation (%)                             | 23±9           | 31±15          | 0.03  |
| Ferritin (ng/ml)                                | 282 (164, 484) | 325 (175, 607) | 0.16  |
| Bicarbonate (mEq/l)                             | 23.6 ± 2.7     | 24.0 ± 3.1     | 0.13  |

Note: Values are expressed as mean±SD, median (IQR), or percentage, appropriately.

Differences in patient characteristics between two groups were compared by standardized difference, of which 0.8, 0.5, and 0.2 in absolute value were considered large, medium, and small differences, respectively. Abbreviations: COPD, chronic obstructive pulmonary disease; Human Immunodeficiency Virus; AIDS, acquired immune deficiency syndrome; WBC, white blood cell; PTH, parathyroid hormone; TIBC, total iron binding capacity. Conversion factors for units: albumin and hemoglobin in g/dL to g/L, 10; creatinine in mg/dL to mmol/L, 88.4; calcium in mg/dL to mmol/L, 0.2495; phosphorus in mg/dL to mmol/L, 0.3229. No conversion is necessary for ferritin in ng/mL and mg/L.

**Supplemental Table 2.** Characteristics of 108,548 incident hemodialysis patients stratified by neutrophil-to-lymphocyte ratio.

|                                      | Neutrophil-to-Lymphocyte Ratio |                   |                   |                   |                   |                   | <i>P</i> <sub>trend</sub> |
|--------------------------------------|--------------------------------|-------------------|-------------------|-------------------|-------------------|-------------------|---------------------------|
|                                      | <2.0                           | 2.0 - <3.0        | 3.0 - <4.0        | 4.0 - <5.0        | 5.0 - <6.0        | ≥6.0              |                           |
| n (%)                                | 10,399 (10%)                   | 26,084 (24%)      | 26,490 (24%)      | 18,303 (17%)      | 11,284 (10%)      | 15,988 (15%)      | N/A                       |
| Age (years)                          | 59 ± 16                        | 61 ± 15           | 62 ± 15           | 64 ± 15           | 65 ± 14           | 66 ± 14           | <0.001                    |
| Female (%)                           | 46                             | 45                | 44                | 43                | 42                | 42                | <0.001                    |
| Race (%)                             |                                |                   |                   |                   |                   |                   |                           |
| Caucasian                            | 30                             | 37                | 44                | 51                | 56                | 65                | <0.001                    |
| African American                     | 51                             | 39                | 31                | 27                | 23                | 19                | <0.001                    |
| Hispanics                            | 14                             | 17                | 17                | 15                | 14                | 10                | <0.001                    |
| Asians                               | 2                              | 3                 | 4                 | 3                 | 3                 | 3                 | 0.83                      |
| Others                               | 3                              | 4                 | 4                 | 4                 | 4                 | 3                 | <0.001                    |
| Insurance (%)                        |                                |                   |                   |                   |                   |                   |                           |
| Medicare                             | 50                             | 51                | 53                | 55                | 57                | 57                | <0.001                    |
| Medicaid                             | 9                              | 8                 | 7                 | 7                 | 6                 | 5                 | <0.001                    |
| Others                               | 41                             | 41                | 40                | 39                | 37                | 37                | <0.001                    |
| Access Type (%)                      |                                |                   |                   |                   |                   |                   |                           |
| Central venous catheter              | 67                             | 72                | 75                | 77                | 78                | 80                | <0.001                    |
| AV Fistula                           | 19                             | 17                | 15                | 14                | 13                | 11                | <0.001                    |
| AV Graft                             | 6                              | 5                 | 4                 | 4                 | 3                 | 3                 | <0.001                    |
| AV Other                             | 0.1                            | 0.1               | 0.1               | 0.1               | 0.1               | 0.0               | 0.001                     |
| Unknown                              | 8                              | 6                 | 6                 | 5                 | 5                 | 6                 | <0.001                    |
| Body Mass Index (kg/m <sup>2</sup> ) | 26.6 (23.1, 31.7)              | 27.0 (23.2, 32.1) | 26.8 (23.0, 31.8) | 26.7 (23.0, 31.9) | 26.4 (22.7, 31.7) | 26.1 (22.4, 31.2) | <0.001                    |
| Single-pool Kt/v                     | 1.47 ± 0.33                    | 1.47 ± 0.33       | 1.47 ± 0.32       | 1.47 ± 0.32       | 1.46 ± 0.32       | 1.46 ± 0.33       | 0.002                     |
| NPCR (g/kg per day)                  | 0.75 (0.62, 0.89)              | 0.77 (0.64, 0.91) | 0.77 (0.64, 0.92) | 0.77 (0.64, 0.92) | 0.77 (0.64, 0.93) | 0.77 (0.64, 0.93) | <0.001                    |
| Co-morbidities (%)                   |                                |                   |                   |                   |                   |                   |                           |
| Hypertension                         | 55                             | 53                | 52                | 50                | 50                | 48                | <0.001                    |
| Diabetes                             | 54                             | 58                | 60                | 60                | 60                | 57                | <0.001                    |
| Dyslipidemia                         | 25                             | 25                | 25                | 25                | 26                | 26                | 0.17                      |
| Atherosclerotic heart disease        | 13                             | 13                | 15                | 15                | 16                | 16                | <0.001                    |
| Congestive heart failure             | 33                             | 35                | 37                | 38                | 39                | 39                | <0.001                    |
| Other cardiac disease                | 12                             | 14                | 15                | 16                | 17                | 18                | <0.001                    |

|                                                 |                |                |                |                |                |                 |        |
|-------------------------------------------------|----------------|----------------|----------------|----------------|----------------|-----------------|--------|
| Cerebrovascular disease                         | 1              | 2              | 2              | 2              | 2              | 2               | 0.029  |
| Cancer                                          | 2              | 2              | 2              | 2              | 2              | 4               | <0.001 |
| COPD                                            | 4              | 4              | 5              | 6              | 6              | 7               | <0.001 |
| HIV                                             | 1.8            | 0.6            | 0.3            | 0.3            | 0.3            | 0.3             | <0.001 |
| Liver Disease                                   | 1              | 1              | 1              | 2              | 2              | 2               | <0.001 |
| Alcohol                                         | 0.3            | 0.3            | 0.2            | 0.2            | 0.2            | 0.2             | 0.39   |
| Substance Abuse                                 | 0.5            | 0.3            | 0.2            | 0.1            | 0.2            | 0.1             | <0.001 |
| Laboratory variables                            |                |                |                |                |                |                 |        |
| Hemoglobin (g/dl)                               | 11.3 ± 1.2     | 11.2 ± 1.2     | 11.2 ± 1.2     | 11.1 ± 1.2     | 11.0 ± 1.2     | 10.8 ± 1.2      | <0.001 |
| WBC (x10 <sup>3</sup> /mm <sup>3</sup> )        | 6.3 (5.1, 7.6) | 6.9 (5.7, 8.2) | 7.4 (6.1, 8.8) | 7.9 (6.5, 9.4) | 8.1 (6.8, 9.7) | 8.9 (7.3, 10.8) | <0.001 |
| Neutrophil (x10 <sup>3</sup> /mm <sup>3</sup> ) | 3.4 (2.7, 4.1) | 4.3 (3.6, 5.2) | 5.0 (4.2, 6.0) | 5.7 (4.7, 6.8) | 6.1 (5.0, 7.3) | 7.0 (5.7, 8.5)  | <0.001 |
| Lymphocyte (x10 <sup>3</sup> /mm <sup>3</sup> ) | 2.1 (1.7, 2.6) | 1.7 (1.4, 2.1) | 1.5 (1.2, 1.8) | 1.3 (1.1, 1.6) | 1.2 (0.9, 1.4) | 0.9 (0.7, 1.2)  | <0.001 |
| Platelet (x10 <sup>3</sup> /mm <sup>3</sup> )   | 241 (193, 298) | 249 (202, 304) | 250 (201, 306) | 251 (201, 311) | 252 (198, 312) | 247 (193, 313)  | <0.001 |
| Albumin (g/dl)                                  | 3.6 ± 0.5      | 3.6 ± 0.5      | 3.5 ± 0.5      | 3.5 ± 0.5      | 3.4 ± 0.5      | 3.4 ± 0.5       | <0.001 |
| Creatinine (g/dl)                               | 6.4 ± 2.6      | 6.2 ± 2.5      | 6.0 ± 2.4      | 5.7 ± 2.3      | 5.5 ± 2.2      | 5.3 ± 2.1       | <0.001 |
| Calcium (mg/dl)                                 | 9.1 ± 0.6      | 9.1 ± 0.6      | 9.1 ± 0.6      | 9.1 ± 0.6      | 9.1 ± 0.6      | 9.1 ± 0.6       | <0.001 |
| Phosphorus (mg/dl)                              | 4.9 ± 1.1      | 5.0 ± 1.1      | 5.0 ± 1.1      | 4.9 ± 1.1      | 4.9 ± 1.2      | 4.8 ± 1.2       | <0.001 |
| iPTH (pg/ml)                                    | 335 (207, 522) | 334 (211, 521) | 323 (203, 499) | 308 (195, 472) | 295 (189, 453) | 277 (174, 425)  | <0.001 |
| Alkaline Phosphatase (IU/L)                     | 84 (67, 110)   | 85 (67, 111)   | 86 (68, 113)   | 88 (70, 116)   | 89 (71, 120)   | 91 (71, 125)    | <0.001 |
| TIBC (mg/dl)                                    | 233 ± 50       | 231 ± 47       | 227 ± 47       | 224 ± 49       | 220 ± 49       | 212 ± 51        | <0.001 |
| Iron Saturation (%)                             | 31±15          | 31±22          | 31±29          | 31±36          | 31±43          | 31±50           | <0.001 |
| Ferritin (ng/ml)                                | 269 (158, 463) | 261 (153, 439) | 270 (157, 456) | 284 (166, 488) | 302 (173, 511) | 341 (195, 604)  | <0.001 |
| Bicarbonate (mEq/l)                             | 23.5 ± 2.7     | 23.5 ± 2.7     | 23.5 ± 2.7     | 23.6 ± 2.7     | 23.7 ± 2.8     | 23.8 ± 2.8      | <0.001 |

Note: Values are expressed as mean±SD, median (IQR), or percentage, appropriately. Abbreviations: COPD, chronic obstructive pulmonary disease; Human Immunodeficiency Virus; AIDS, acquired immune deficiency syndrome; WBC, white blood cell; PTH, parathyroid hormone; TIBC, total iron binding capacity. Conversion factors for units: albumin and hemoglobin in g/dL to g/L, 10; creatinine in mg/dL to mmol/L, 88.4; calcium in mg/dL to mmol/L, 0.2495; phosphorus in mg/dL to mmol/L, 0.3229. No conversion is necessary for ferritin in ng/mL and mg/L.

**Supplemental Table 3.** Characteristics of 108,548 incident hemodialysis patients stratified by platelet-to-lymphocyte ratio.

|                                      | Platelet-to-Lymphocyte Ratio |                   |                   |                   |                   |                   | <i>P</i> <sub>trend</sub> |
|--------------------------------------|------------------------------|-------------------|-------------------|-------------------|-------------------|-------------------|---------------------------|
|                                      | <100                         | 100 - <150        | 150 - <200        | 200 - <250        | 250 - <300        | ≥300              |                           |
| n (%)                                | 9,426 (9%)                   | 27,097 (25%)      | 29,298 (27%)      | 19,512 (18%)      | 10,649 (10%)      | 12,566 (12%)      | N/A                       |
| Age (years)                          | 64 ± 15                      | 62 ± 16           | 62 ± 15           | 63 ± 15           | 63 ± 15           | 63 ± 15           | 0.79                      |
| Female (%)                           | 45                           | 45                | 44                | 43                | 43                | 42                | <0.001                    |
| Race (%)                             |                              |                   |                   |                   |                   |                   |                           |
| Caucasian                            | 46                           | 44                | 45                | 47                | 49                | 53                | <0.001                    |
| African American                     | 32                           | 32                | 32                | 32                | 31                | 30                | 0.003                     |
| Hispanics                            | 15                           | 17                | 16                | 14                | 13                | 11                | <0.001                    |
| Asians                               | 4                            | 4                 | 3                 | 3                 | 3                 | 2                 | <0.001                    |
| Others                               | 3                            | 4                 | 4                 | 4                 | 4                 | 3                 | <0.001                    |
| Insurance (%)                        |                              |                   |                   |                   |                   |                   |                           |
| Medicare                             | 55                           | 53                | 53                | 54                | 54                | 54                | 0.72                      |
| Medicaid                             | 8                            | 7                 | 7                 | 7                 | 7                 | 6                 | <0.001                    |
| Others                               | 37                           | 39                | 40                | 40                | 39                | 40                | 0.037                     |
| Access Type (%)                      |                              |                   |                   |                   |                   |                   |                           |
| Central venous catheter              | 73                           | 73                | 74                | 76                | 77                | 78                | <0.001                    |
| AV Fistula                           | 14                           | 16                | 16                | 15                | 14                | 13                | <0.001                    |
| AV Graft                             | 5                            | 5                 | 4                 | 4                 | 3                 | 3                 | <0.001                    |
| AV Other                             | 0.1                          | 0.1               | 0.1               | 0.1               | 0.0               | 0.1               | 0.25                      |
| Unknown                              | 7                            | 6                 | 6                 | 6                 | 5                 | 6                 | <0.001                    |
| Body Mass Index (kg/m <sup>2</sup> ) | 26.5 (22.9, 31.7)            | 27.1 (23.3, 32.3) | 26.9 (23.1, 32.0) | 26.6 (23.0, 31.7) | 26.3 (22.8, 31.3) | 25.8 (22.2, 30.5) | <0.001                    |
| Single-pool Kt/v                     | 1.48 ± 0.33                  | 1.47 ± 0.33       | 1.47 ± 0.32       | 1.47 ± 0.33       | 1.46 ± 0.32       | 1.46 ± 0.33       | <0.001                    |
| NPCR (g/kg per day)                  | 0.75 (0.62, 0.90)            | 0.77 (0.65, 0.92) | 0.77 (0.65, 0.92) | 0.77 (0.64, 0.92) | 0.76 (0.64, 0.91) | 0.76 (0.63, 0.91) | 0.058                     |
| Co-morbidities (%)                   |                              |                   |                   |                   |                   |                   |                           |
| Hypertension                         | 51                           | 52                | 51                | 52                | 51                | 49                | <0.001                    |
| Diabetes                             | 54                           | 58                | 59                | 60                | 60                | 57                | <0.001                    |
| Dyslipidemia                         | 25                           | 25                | 25                | 25                | 26                | 25                | 0.86                      |
| Atherosclerotic heart disease        | 14                           | 14                | 14                | 15                | 15                | 15                | 0.004                     |
| Congestive heart failure             | 35                           | 36                | 37                | 38                | 38                | 38                | <0.001                    |

|                                                 |                |                |                |                |                |                |        |
|-------------------------------------------------|----------------|----------------|----------------|----------------|----------------|----------------|--------|
| Other cardiac disease                           | 14             | 15             | 15             | 16             | 16             | 16             | <0.001 |
| Cerebrovascular disease                         | 2              | 2              | 2              | 2              | 2              | 2              | 0.12   |
| Cancer                                          | 3              | 2              | 2              | 2              | 3              | 3              | <0.001 |
| COPD                                            | 5              | 5              | 5              | 5              | 5              | 6              | <0.001 |
| HIV                                             | 1.0            | 0.5            | 0.4            | 0.4            | 0.3            | 0.6            | <0.001 |
| Liver Disease                                   | 3              | 2              | 1              | 1              | 1              | 1              | <0.001 |
| Alcohol                                         | 0.3            | 0.2            | 0.2            | 0.2            | 0.2            | 0.2            | 0.41   |
| Substance Abuse                                 | 0.4            | 0.2            | 0.2            | 0.3            | 0.3            | 0.2            | 0.30   |
| Laboratory variables                            |                |                |                |                |                |                |        |
| WBC (x10 <sup>3</sup> /mm <sup>3</sup> )        | 7.7 (6.3, 9.4) | 7.6 (6.3, 9.1) | 7.4 (6.1, 9.0) | 7.4 (6.0, 8.9) | 7.3 (5.9, 9.0) | 7.4 (5.9, 9.3) | <0.001 |
| Neutrophil (x10 <sup>3</sup> /mm <sup>3</sup> ) | 4.7 (3.6, 5.9) | 4.9 (3.9, 6.1) | 5.1 (4.0, 6.3) | 5.2 (4.1, 6.5) | 5.4 (4.2, 6.8) | 5.7 (4.3, 7.2) | <0.001 |
| Lymphocyte (x10 <sup>3</sup> /mm <sup>3</sup> ) | 2.1 (1.6, 2.6) | 1.8 (1.5, 2.1) | 1.5 (1.2, 1.8) | 1.3 (1.1, 1.5) | 1.1 (0.9, 1.3) | 0.9 (0.7, 1.1) | <0.001 |
| Hemoglobin (g/dl)                               | 11.2 ± 1.3     | 11.3 ± 1.1     | 11.2 ± 1.1     | 11.0 ± 1.2     | 10.9 ± 1.1     | 10.7 ± 1.2     | <0.001 |
| Platelet (x10 <sup>3</sup> /mm <sup>3</sup> )   | 167 (125, 210) | 219 (179, 262) | 251 (208, 298) | 275 (227, 328) | 293 (242, 351) | 317 (254, 388) | <0.001 |
| Albumin (g/dl)                                  | 3.5 ± 0.5      | 3.6 ± 0.5      | 3.5 ± 0.5      | 3.5 ± 0.5      | 3.5 ± 0.5      | 3.4 ± 0.5      | <0.001 |
| Creatinine (g/dl)                               | 5.9 ± 2.3      | 6.0 ± 2.4      | 5.9 ± 2.4      | 5.8 ± 2.3      | 5.7 ± 2.3      | 5.5 ± 2.3      | <0.001 |
| Calcium (mg/dl)                                 | 9.1 ± 0.6      | 9.1 ± 0.6      | 9.1 ± 0.6      | 9.1 ± 0.6      | 9.1 ± 0.6      | 9.1 ± 0.6      | 0.70   |
| Phosphorus (mg/dl)                              | 4.8 ± 1.1      | 4.9 ± 1.2      | 5.0 ± 1.2      | 5.0 ± 1.1      | 4.9 ± 1.1      | 4.8 ± 1.2      | 0.060  |
| Intact PTH (pg/ml)                              | 297 (183, 469) | 321 (204, 496) | 325 (203, 500) | 314 (200, 487) | 304 (193, 473) | 290 (178, 454) | <0.001 |
| Alkaline Phosphatase (IU/L)                     | 90 (69, 119)   | 86 (69, 112)   | 86 (68, 112)   | 87 (69, 115)   | 88 (69, 116)   | 90 (70, 124)   | <0.001 |
| TIBC (mg/dl)                                    | 224 ± 52       | 228 ± 47       | 227 ± 48       | 225 ± 48       | 223 ± 50       | 214 ± 51       | <0.001 |
| Iron Saturation (%)                             | 31±15          | 31±22          | 31±29          | 31±36          | 31±43          | 31±50          | <0.001 |
| Ferritin (ng/ml)                                | 306 (179, 539) | 273 (160, 457) | 271 (159, 460) | 278 (159, 473) | 288 (166, 503) | 324 (182, 573) | <0.001 |
| Bicarbonate (meq/l)                             | 23.5 ± 2.7     | 23.5 ± 2.7     | 23.6 ± 2.7     | 23.6 ± 2.7     | 23.7 ± 2.7     | 23.8 ± 2.7     | <0.001 |

Note: Values are expressed as mean±SD, median (IQR), or percentage, appropriately. Abbreviations: COPD, chronic obstructive pulmonary disease; Human Immunodeficiency Virus; AIDS, acquired immune deficiency syndrome; WBC, white blood cell; PTH, parathyroid hormone; TIBC, total iron binding capacity. Conversion factors for units: albumin and hemoglobin in g/dL to g/L, 10; creatinine in mg/dL to mmol/L, 88.4; calcium in mg/dL to mmol/L, 0.2495; phosphorus in mg/dL to mmol/L, 0.3229. No conversion is necessary for ferritin in ng/mL and mg/L.

**Supplemental Table 4.** Case-mix adjusted associations of baseline laboratory parameters with high neutrophil-to-lymphocyte ratio (NLR;  $\geq 4.0$  vs.  $< 4.0$ ) and platelet-to-lymphocyte ratio (PLR;  $\geq 200$  vs.  $< 200$ ) among 108,548 incident hemodialysis patients.

|                                      | NLR $\geq 4.0$ (vs. $< 4.0$ ) |           | PLR $\geq 200$ (vs. $< 200$ ) |           |
|--------------------------------------|-------------------------------|-----------|-------------------------------|-----------|
|                                      | OR (95% CI)                   | P         | OR (95% CI)                   | P         |
| WBC (per $\times 10^3/\mu\text{L}$ ) | 1.30 (1.29, 1.31)             | $< 0.001$ | 0.97 (0.97, 0.98)             | $< 0.001$ |
| Hemoglobin (per 1 g/dL)              | 0.81 (0.80, 0.82)             | $< 0.001$ | 0.78 (0.78, 0.79)             | $< 0.001$ |
| Albumin (per 0.1 g/dL)               | 0.95 (0.94, 0.95)             | $< 0.001$ | 0.97 (0.97, 0.97)             | $< 0.001$ |
| Creatinine (per 1 g/dL)              | 0.94 (0.93, 0.95)             | $< 0.001$ | 0.95 (0.95, 0.96)             | $< 0.001$ |
| Calcium (per 0.1 mg/dL)              | 0.99 (0.99, 1.00)             | $< 0.001$ | 1.00 (1.00, 1.00)             | 0.079     |
| Phosphorus (per 1 mg/dL)             | 0.94 (0.93, 0.95)             | $< 0.001$ | 1.00 (0.99, 1.01)             | 0.55      |
| Intact PTH                           |                               |           |                               |           |
| $< 150$ pg/mL                        | <i>Reference</i>              |           | <i>Reference</i>              |           |
| 150 - 300 pg/mL                      | 1.00 (0.96, 1.04)             | 0.98      | 0.97 (0.93, 1.00)             | 0.084     |
| 300 - 600 pg/mL                      | 0.92 (0.89, 0.96)             | $< 0.001$ | 0.93 (0.90, 0.96)             | $< 0.001$ |
| $\geq 600$ pg/mL                     | 0.84 (0.80, 0.88)             | $< 0.001$ | 0.91 (0.87, 0.95)             | $< 0.001$ |
| Alkaline phosphatase (per 10 IU/L)   | 1.02 (1.02, 1.02)             | $< 0.001$ | 1.01 (1.01, 1.01)             | $< 0.001$ |
| Iron Saturation (per 1%)             | 0.98 (0.98, 0.98)             | $< 0.001$ | 0.97 (0.97, 0.97)             | $< 0.001$ |
| TIBC (per 10 mg/dL)                  | 0.95 (0.95, 0.96)             | $< 0.001$ | 0.98 (0.98, 0.98)             | $< 0.001$ |
| Ferritin                             |                               |           |                               |           |
| $< 150$ ng/mL                        | <i>Reference</i>              |           | <i>Reference</i>              |           |
| 150 - 300 ng/mL                      | 1.10 (1.06, 1.14)             | $< 0.001$ | 0.95 (0.92, 0.98)             | 0.003     |
| 300 - 600 ng/mL                      | 1.25 (1.21, 1.30)             | $< 0.001$ | 1.01 (0.98, 1.05)             | 0.46      |
| $\geq 600$ ng/mL                     | 1.73 (1.66, 1.80)             | $< 0.001$ | 1.13 (1.09, 1.17)             | $< 0.001$ |
| Bicarbonate (per 1 mEq/L)            | 1.01 (1.00, 1.01)             | 0.002     | 1.02 (1.01, 1.02)             | $< 0.001$ |

Each OR is estimated from a separate regression, adjusted for case-mix characteristics including baseline age, sex, race/ethnicity, primary insurance, vascular access type, comorbidities, and single-pool Kt/V. Abbreviations: WBC, white blood cell; PTH, parathyroid hormone; TIBC, total iron binding capacity.



**Supplemental Table 5.** Hazard ratios for all-cause mortality of neutrophil-to-lymphocyte ratio (NLR) and platelet-to-lymphocyte ratio (PLR) with three-level hierarchical adjustments.

|                                                           | Baseline model     |                    |                    | Time-varying model |                    |                    |
|-----------------------------------------------------------|--------------------|--------------------|--------------------|--------------------|--------------------|--------------------|
|                                                           | Unadjusted         | Case-mix adjusted  | MICS adjusted      | Unadjusted         | Case-mix adjusted  | MICS adjusted      |
| <b><i>NLR</i></b>                                         |                    |                    |                    |                    |                    |                    |
| <2.0                                                      | 0.91 (0.87 - 0.96) | 0.97 (0.92 - 1.02) | 0.95 (0.90 - 1.00) | 0.78 (0.73 - 0.83) | 0.84 (0.79 - 0.89) | 0.90 (0.83 - 0.97) |
| 2.0 - <3.0                                                | Reference          | Reference          | Reference          | Reference          | Reference          | Reference          |
| 3.0 - <4.0                                                | 1.23 (1.19 - 1.28) | 1.16 (1.12 - 1.20) | 1.11 (1.07 - 1.15) | 1.48 (1.41 - 1.55) | 1.36 (1.29 - 1.42) | 1.17 (1.10 - 1.24) |
| 4.0 - <5.0                                                | 1.52 (1.47 - 1.58) | 1.35 (1.30 - 1.40) | 1.24 (1.20 - 1.29) | 2.16 (2.06 - 2.27) | 1.83 (1.74 - 1.93) | 1.39 (1.31 - 1.48) |
| 5.0 - <6.0                                                | 1.83 (1.75 - 1.90) | 1.53 (1.47 - 1.60) | 1.36 (1.30 - 1.42) | 3.28 (3.11 - 3.45) | 2.63 (2.49 - 2.77) | 1.74 (1.63 - 1.86) |
| ≥6.0                                                      | 2.46 (2.37 - 2.56) | 1.94 (1.87 - 2.02) | 1.57 (1.51 - 1.64) | 6.29 (6.03 - 6.57) | 4.54 (4.34 - 4.75) | 2.38 (2.25 - 2.52) |
| <b><i>PLR</i></b>                                         |                    |                    |                    |                    |                    |                    |
| <100                                                      | 1.28 (1.22 - 1.34) | 1.21 (1.15 - 1.26) | 1.12 (1.07 - 1.17) | 1.41 (1.35 - 1.48) | 1.39 (1.32 - 1.46) | 1.26 (1.19 - 1.34) |
| 100 - <150                                                | Reference          | Reference          | Reference          | Reference          | Reference          | Reference          |
| 150 - <200                                                | 1.05 (1.02 - 1.09) | 1.05 (1.01 - 1.09) | 1.02 (0.98 - 1.05) | 1.30 (1.24 - 1.35) | 1.21 (1.16 - 1.26) | 1.10 (1.05 - 1.16) |
| 200 - <250                                                | 1.15 (1.11 - 1.19) | 1.12 (1.08 - 1.16) | 1.05 (1.01 - 1.09) | 1.76 (1.69 - 1.84) | 1.52 (1.45 - 1.59) | 1.16 (1.10 - 1.23) |
| 250 - <300                                                | 1.32 (1.27 - 1.38) | 1.25 (1.20 - 1.31) | 1.12 (1.07 - 1.17) | 2.36 (2.24 - 2.49) | 1.88 (1.78 - 1.98) | 1.25 (1.18 - 1.34) |
| ≥300                                                      | 1.56 (1.50 - 1.62) | 1.43 (1.37 - 1.48) | 1.14 (1.10 - 1.19) | 4.02 (3.85 - 4.21) | 2.95 (2.82 - 3.09) | 1.47 (1.39 - 1.56) |
| MICS, malnutrition-inflammation-cachexia complex syndrome |                    |                    |                    |                    |                    |                    |

**Supplemental Table 6.** Reclassification table for predicting 1-year mortality from the models with and without serum albumin in addition to the case-mix variables, at arbitrary cutoff values of 10%, 15%, and 20%.

| <b>Case-mix variables<br/>without serum albumin</b> | <b>Serum albumin as a new predictor in addition to case-mix variables</b> |        |        |        |        |
|-----------------------------------------------------|---------------------------------------------------------------------------|--------|--------|--------|--------|
| <i>Event</i>                                        | <10%                                                                      | 10-15% | 15-20% | ≥20%   | Total  |
| <10%                                                | 1,927                                                                     | 562    | 215    | 194    | 2,898  |
| 10-15%                                              | 731                                                                       | 1,086  | 632    | 631    | 3,080  |
| 15-20%                                              | 172                                                                       | 679    | 705    | 1,210  | 2,766  |
| ≥20%                                                | 21                                                                        | 259    | 705    | 4,129  | 5,114  |
| Total                                               | 2,851                                                                     | 2,586  | 2,257  | 6,164  | 13,858 |
| <i>No Event</i>                                     |                                                                           |        |        |        |        |
| <10%                                                | 40,960                                                                    | 3,988  | 1,045  | 628    | 46,621 |
| 10-15%                                              | 9,591                                                                     | 6,957  | 2,690  | 1,741  | 20,979 |
| 15-20%                                              | 1,783                                                                     | 4,612  | 3,233  | 3,058  | 12,686 |
| ≥20%                                                | 181                                                                       | 1,753  | 3,165  | 9,305  | 14,404 |
| Total                                               | 52,515                                                                    | 17,310 | 10,133 | 14,732 | 94,690 |

**Supplemental Table 7.** Reclassification table for predicting 1-year mortality from the models with and without serum alkaline phosphatase (ALP) in addition to the case-mix variables, at arbitrary cutoff values of 10%, 15%, and 20%.

| Case-mix variables<br>without serum ALP | Serum ALP as a new predictor in addition to case-mix variables |        |        |        |        | Total |
|-----------------------------------------|----------------------------------------------------------------|--------|--------|--------|--------|-------|
|                                         | <10%                                                           | 10-15% | 15-20% | ≥20%   | Total  |       |
| <i>Event</i>                            |                                                                |        |        |        |        |       |
| <10%                                    | 2,536                                                          | 269    | 42     | 51     | 2,898  |       |
| 10-15%                                  | 323                                                            | 2,256  | 378    | 123    | 3,080  |       |
| 15-20%                                  | 0                                                              | 395    | 1,900  | 471    | 2,766  |       |
| ≥20%                                    | 0                                                              | 0      | 396    | 4,718  | 5,114  |       |
| Total                                   | 2,859                                                          | 2,920  | 2,716  | 5,363  | 13,858 |       |
| <i>No Event</i>                         |                                                                |        |        |        |        |       |
| <10%                                    | 44,559                                                         | 1,720  | 166    | 176    | 46,621 |       |
| 10-15%                                  | 3,409                                                          | 15,769 | 1,398  | 403    | 20,979 |       |
| 15-20%                                  | 0                                                              | 2,631  | 8,836  | 1,219  | 12,686 |       |
| ≥20%                                    | 0                                                              | 0      | 1,786  | 12,618 | 14,404 |       |
| Total                                   | 47,968                                                         | 20,120 | 12,186 | 14,416 | 94,690 |       |

**Supplemental Table 8.** Reclassification table for predicting 1-year mortality from the models with and without neutrophil-to-lymphocyte ratio (NLR) in addition to the case-mix variables, at arbitrary cutoff values of 10%, 15%, and 20%.

| <b>Case-mix variables<br/>without NLR</b> | <b>Serum NLR as a new predictor in addition to case-mix variables</b> |        |        |        |        |
|-------------------------------------------|-----------------------------------------------------------------------|--------|--------|--------|--------|
| <i>Event</i>                              | <10%                                                                  | 10-15% | 15-20% | ≥20%   | Total  |
| <10%                                      | 2,302                                                                 | 460    | 108    | 28     | 2,898  |
| 10-15%                                    | 643                                                                   | 1,529  | 576    | 332    | 3,080  |
| 15-20%                                    | 13                                                                    | 783    | 1,077  | 893    | 2,766  |
| ≥20%                                      | 0                                                                     | 59     | 821    | 4,234  | 5,114  |
| Total                                     | 2,958                                                                 | 2,831  | 2,582  | 5,487  | 13,858 |
| <i>No Event</i>                           |                                                                       |        |        |        |        |
| <10%                                      | 42,788                                                                | 3,230  | 471    | 132    | 46,621 |
| 10-15%                                    | 6,726                                                                 | 10,754 | 2,548  | 951    | 20,979 |
| 15-20%                                    | 80                                                                    | 5,185  | 4,840  | 2,581  | 12,686 |
| ≥20%                                      | 0                                                                     | 363    | 3,536  | 10,505 | 14,404 |
| Total                                     | 49,594                                                                | 19,532 | 11,395 | 14,169 | 94,690 |

**Supplemental Table 9.** Reclassification table for predicting 1-year mortality from the models with and without platelet-to-lymphocyte ratio (PLR) in addition to the case-mix variables, at arbitrary cutoff values of 10%, 15%, and 20%.

| <b>Case-mix variables<br/>without PLR</b> | <b>Serum PLR as a new predictor in addition to case-mix variables</b> |        |        |        |        |
|-------------------------------------------|-----------------------------------------------------------------------|--------|--------|--------|--------|
| <i>Event</i>                              | <10%                                                                  | 10-15% | 15-20% | ≥20%   | Total  |
| <10%                                      | 2,669                                                                 | 226    | 3      | 0      | 2,898  |
| 10-15%                                    | 250                                                                   | 2,443  | 369    | 18     | 3,080  |
| 15-20%                                    | 0                                                                     | 321    | 2,061  | 384    | 2,766  |
| ≥20%                                      | 0                                                                     | 0      | 348    | 4,766  | 5,114  |
| Total                                     | 2,919                                                                 | 2,990  | 2,781  | 5,168  | 13,858 |
| <i>No Event</i>                           |                                                                       |        |        |        |        |
| <10%                                      | 44,814                                                                | 1,784  | 23     | 0      | 46,621 |
| 10-15%                                    | 2,168                                                                 | 17,081 | 1,675  | 55     | 20,979 |
| 15-20%                                    | 0                                                                     | 1,807  | 9,512  | 1,367  | 12,686 |
| ≥20%                                      | 0                                                                     | 0      | 1,323  | 13,081 | 14,404 |
| Total                                     | 46,982                                                                | 20,672 | 12,533 | 14,503 | 94,690 |

**Supplemental Table 10.** Reclassification table for predicting 1-year mortality from the models with and without serum alkaline phosphatase (ALP) in addition to the case-mix variables and serum albumin, at arbitrary cutoff values of 10%, 15%, and 20%.

| <b>Case-mix variables and serum albumin without serum ALP</b> | <b>Serum ALP as a new predictor in addition to case-mix variables and serum albumin</b> |        |        |        |        |
|---------------------------------------------------------------|-----------------------------------------------------------------------------------------|--------|--------|--------|--------|
| <i>Event</i>                                                  | <10%                                                                                    | 10-15% | 15-20% | ≥20%   | Total  |
| <10%                                                          | 2,660                                                                                   | 172    | 5      | 14     | 2,851  |
| 10-15%                                                        | 164                                                                                     | 2,130  | 238    | 54     | 2,586  |
| 15-20%                                                        | 0                                                                                       | 229    | 1,739  | 289    | 2,257  |
| ≥20%                                                          | 0                                                                                       | 0      | 266    | 5,898  | 6,164  |
| Total                                                         | 2,824                                                                                   | 2,531  | 2,248  | 6,255  | 13,858 |
| <i>No Event</i>                                               |                                                                                         |        |        |        |        |
| <10%                                                          | 51,263                                                                                  | 1,099  | 87     | 66     | 52,515 |
| 10-15%                                                        | 1,777                                                                                   | 14,436 | 918    | 179    | 17,310 |
| 15-20%                                                        | 0                                                                                       | 1,428  | 7,933  | 772    | 10,133 |
| ≥20%                                                          | 0                                                                                       | 0      | 1,057  | 13,675 | 14,732 |
| Total                                                         | 53,040                                                                                  | 16,963 | 9,995  | 14,692 | 94,690 |

**Supplemental Table 11.** Reclassification table for predicting 1-year mortality from the models with and without neutrophil-to-lymphocyte ratio (NLR) in addition to the case-mix variables and serum albumin, at arbitrary cutoff values of 10%, 15%, and 20%.

| <b>Case-mix variables and serum albumin without NLR</b> | <b>Serum NLR as a new predictor in addition to case-mix variables and serum albumin</b> |        |        |        |        |
|---------------------------------------------------------|-----------------------------------------------------------------------------------------|--------|--------|--------|--------|
| <i>Event</i>                                            | <10%                                                                                    | 10-15% | 15-20% | ≥20%   | Total  |
| <10%                                                    | 2,402                                                                                   | 381    | 60     | 8      | 2,851  |
| 10-15%                                                  | 425                                                                                     | 1,516  | 437    | 208    | 2,586  |
| 15-20%                                                  | 1                                                                                       | 574    | 1,031  | 651    | 2,257  |
| ≥20%                                                    | 0                                                                                       | 14     | 613    | 5,537  | 6,164  |
| Total                                                   | 2,828                                                                                   | 2,485  | 2,141  | 6,404  | 13,858 |
| <i>No Event</i>                                         |                                                                                         |        |        |        |        |
| <10%                                                    | 49,575                                                                                  | 2,663  | 246    | 31     | 52,515 |
| 10-15%                                                  | 4,504                                                                                   | 10,183 | 2,084  | 539    | 17,310 |
| 15-20%                                                  | 6                                                                                       | 3,584  | 4,610  | 1,933  | 10,133 |
| ≥20%                                                    | 0                                                                                       | 98     | 2,628  | 12,006 | 14,732 |
| Total                                                   | 54,085                                                                                  | 16,528 | 9,568  | 14,509 | 94,690 |

**Supplemental Table 12.** Reclassification table for predicting 1-year mortality from the models with and without neutrophil-to-lymphocyte ratio (NLR) in addition to the case-mix variables and serum albumin, at arbitrary cutoff values of 10%, 15%, and 20%.

| <b>Case-mix variables and serum albumin without PLR</b> | <b>Serum PLR as a new predictor in addition to case-mix variables and serum albumin</b> |        |        |        |        |
|---------------------------------------------------------|-----------------------------------------------------------------------------------------|--------|--------|--------|--------|
| <i>Event</i>                                            | <10%                                                                                    | 10-15% | 15-20% | ≥20%   | Total  |
| <10%                                                    | 2,723                                                                                   | 128    | 0      | 0      | 2,851  |
| 10-15%                                                  | 118                                                                                     | 2,267  | 200    | 1      | 2,586  |
| 15-20%                                                  | 0                                                                                       | 185    | 1,886  | 186    | 2,257  |
| ≥20%                                                    | 0                                                                                       | 0      | 192    | 5,972  | 6,164  |
| Total                                                   | 2,841                                                                                   | 2,580  | 2,278  | 6,159  | 13,858 |
| <i>No Event</i>                                         |                                                                                         |        |        |        |        |
| <10%                                                    | 51,495                                                                                  | 1,020  | 0      | 0      | 52,515 |
| 10-15%                                                  | 1,092                                                                                   | 15,319 | 894    | 5      | 17,310 |
| 15-20%                                                  | 0                                                                                       | 916    | 8,487  | 730    | 10,133 |
| ≥20%                                                    | 0                                                                                       | 0      | 748    | 13,984 | 14,732 |
| Total                                                   | 52,587                                                                                  | 17,255 | 10,129 | 14,719 | 94,690 |



**Supplemental Figure 1.** Cohort construction

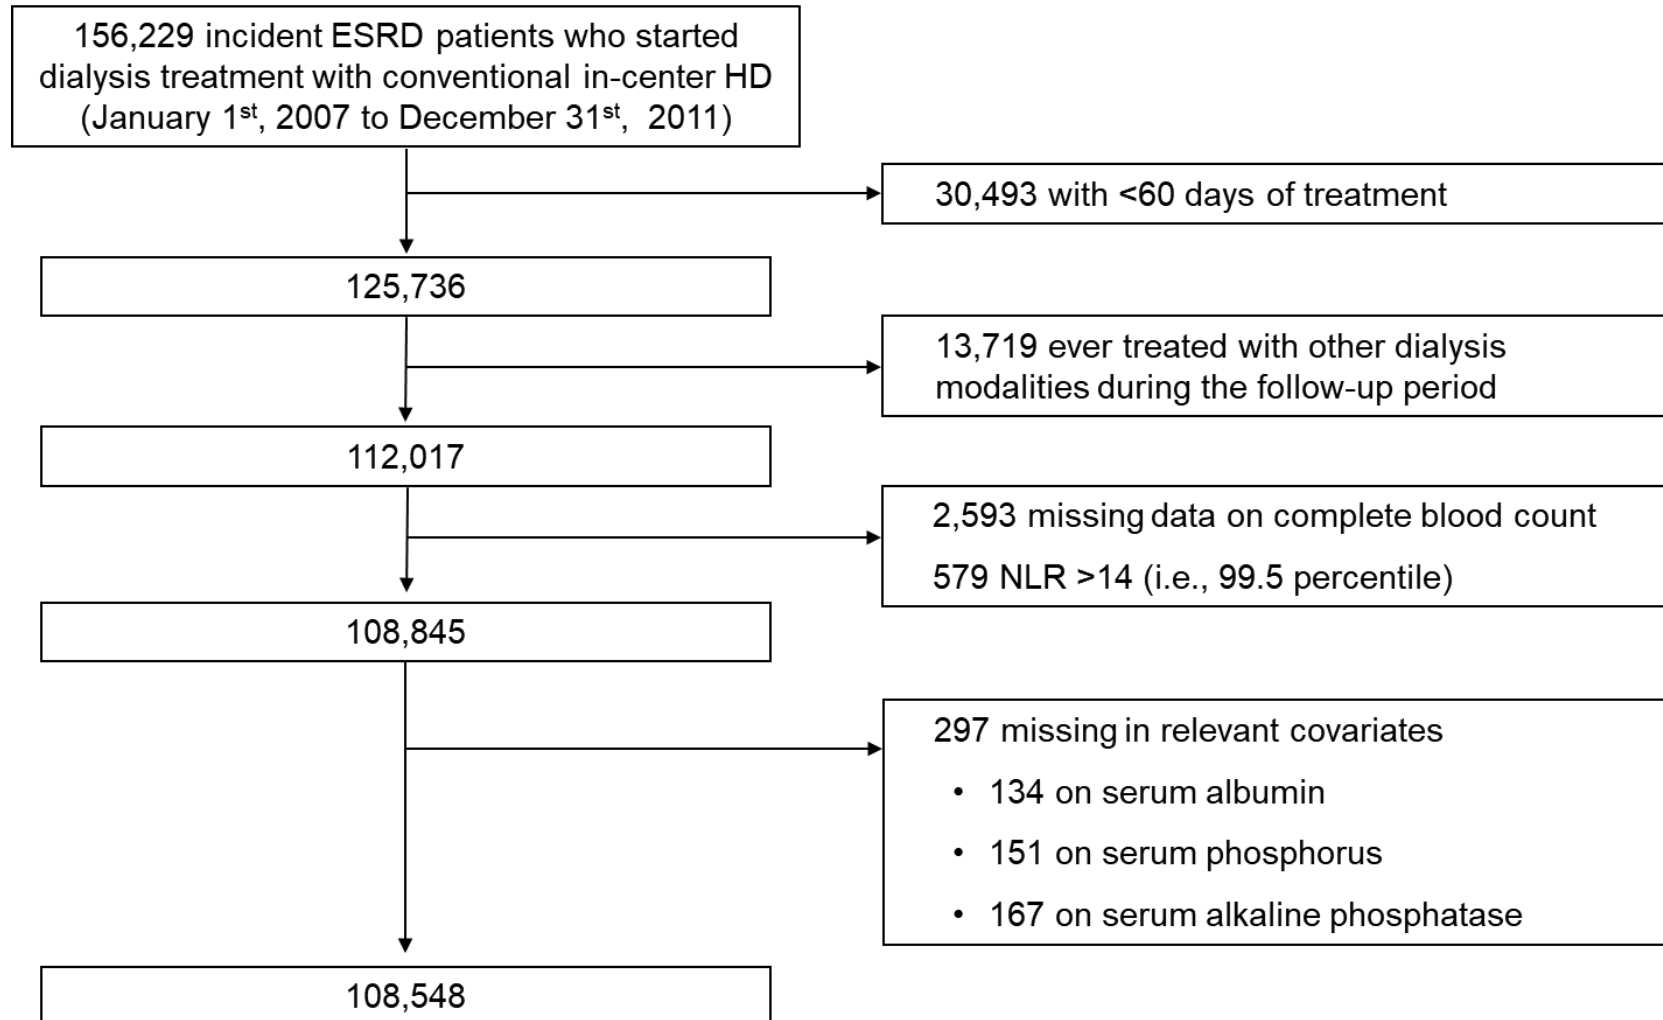

Supplement: NIHMS914306-supplement-supplement_1.pdf [file NIHMS914306-supplement-supplement_1.pdf]
